# Supplementary material for: Canonical and Alternative Auxin Signaling Systems in Mono-, Di-, and Tetraploid Potatoes
Source: MDPI journal article supplement (doi:10.3390/ijms241411408), 2023-07-13
Supplement: s1 [file s1]

## Supplementary data

to article by Lomin et al. "Canonic and Alternative Auxin Signaling..."

**Table S1 (beginning).** Potato genes/proteins presumably involved in auxin signaling, exemplified by DM 'Phureja' and tetraploid 'Otava' cultivars

| Gene name               | Gene symbol DM | Protein DM                                            | Amino acids         | Gene symbol Otava | Protein Otava  | Amino acids |
|-------------------------|----------------|-------------------------------------------------------|---------------------|-------------------|----------------|-------------|
| <b>TIR1/AFB related</b> | 5              |                                                       |                     | 13                |                |             |
| StTIR1a                 | LOC102578999*  | XP_006352806.1                                        | 580                 | KY289_028764*     | KAH0660016.1   | 580         |
|                         |                |                                                       |                     | KY290_029572*     | KAH0750340.1   | 580         |
| StTIR1b                 | LOC102583018*  | XP_006359432.1                                        | 581                 | KY285_036735*     | KAH0640149.1   | 581         |
|                         |                |                                                       |                     | KY284_037768*     | KAH0634982.1   | 581         |
|                         |                |                                                       |                     | KY290_037414*     | KAH0738709.1   | 581         |
| StTIR1c                 | LOC102578728*  | XP_006362983.1/84.1                                   | 605/ <u>510</u>     | KY289_029125*     | KAH0660377.1   | 605         |
|                         |                |                                                       |                     | KY285_025893*     | KAH0664687.1   | 604         |
|                         |                |                                                       |                     | KY284_026005*     | KAH0661074.1   | 604         |
| StAFB4                  | LOC102578575*  | XP_006338135.1                                        | 617                 | KY289_021518*     | KAH0683766.1   | 622         |
|                         |                |                                                       |                     | KY285_021251*     | KAH0694154.1   | 623         |
|                         |                |                                                       |                     | KY284_021302*     | KAH0680217.1   | 613         |
| StAFB6                  | LOC102595865*  | XP_015164173.1/<br>XP_006347140.1                     | 589                 | KY285_014045*     | KAH0718014.1   | 589         |
|                         |                |                                                       |                     | KY289_014659*     | KAH0697177.1   | 589         |
| <b>ARF activators</b>   | 9              |                                                       |                     | 20                |                |             |
| StARF5                  | LOC102590158*  | XP_006342026.1                                        | 929                 | KY284_021699*     | KAH0680614.1   | 929         |
| StARF6a                 | LOC102606235*  | XP_006357892.1/93.1                                   | 893/892             | KY289_030941*     | KAH0653263.1   | 894         |
|                         |                |                                                       |                     | KY284_030624*     | KAH0650712.1   | 892         |
|                         |                |                                                       |                     | KY285_032006*     | KAH0657124.1   | 892         |
| StARF6b                 | LOC102598519*  | XP_006351989.1/90.1                                   | 884/883             | KY289_011869*     | KAH0706793.1   | 884         |
|                         |                |                                                       |                     | KY290_011314*     | KAH0774177.1   | 882         |
|                         |                |                                                       |                     | KY284_011391*     | KAH0709964.1   | 882         |
| StARF8a                 | LOC102597704*  | XP_006343312.1/ <u>13.1/</u><br><u>XP_015162339.1</u> | 848/ <u>752/752</u> | KY284_018481*     | KAH0687928.1   | 842         |
| StARF8b                 | LOC102598513*  | XP_006350451.1/52.1/<br>XP_015165582.1                | 840/839/ <u>743</u> | KY284_015156*     | KAH0700941.1   | 839         |
|                         |                |                                                       |                     | KY290_015847*     | KAH0771866.1   | 841         |
| StARF8c                 | LOC102597963*  | XP_006350449.1/50.1                                   | 838/837             | KY289_013757*     | KAH0696275.1   | 830         |
|                         |                |                                                       |                     | KY284_015157*     | KAH0700942.1   | 996         |
|                         |                |                                                       |                     | KY289_015516*     | KAH0698034.1   | 796         |
| StARF19a                | LOC102594021*  | XP_006353789.1                                        | 1157                | KY284_030511*     | KAH0650599.1   | 1167        |
|                         |                |                                                       |                     | KY289_030846*     | KAH0653168.1   | 1119        |
| StARF19b                | LOC102592438*  | XP_006365636.1                                        | 1114                | KY289_030181*     | KAH0652503.1   | 1112        |
|                         |                |                                                       |                     | KY284_029972*     | KAH0650060.1   | 1113        |
|                         |                |                                                       |                     | KY285_030018*     | KAH0655136.1   | 1110        |
| StARF19c                | LOC102587769*  | XP_006360656.1/57.1                                   | 1097                | KY284_024163*     | KAH0673076.1.1 | 1095        |
|                         |                |                                                       |                     | KY289_024436*     | KAH0669943.1   | 1096        |

\* and \*\* means that the gene presumably belongs to canonical or alternative auxin signaling system, respectively.

**Table S1 (continuation 1).** Potato genes/proteins presumably involved in auxin signaling, exemplified by DM 'Phureja' and tetraploid 'Otava' cultivars

| Gene name             | Gene symbol DM | Protein DM                                          | Amino acids            | Gene symbol Otava | Protein Otava       | Amino acids |
|-----------------------|----------------|-----------------------------------------------------|------------------------|-------------------|---------------------|-------------|
| <b>ARF inhibitors</b> | 7(6)           |                                                     |                        | 12(11)            |                     |             |
| StARF1                | LOC102604408*  | XP_015165011.1/<br>XP_006349280.1/81.1/82.1         | 654                    | KY289_003002*     | KAH0731814.1        | 679         |
|                       |                |                                                     |                        | KY290_002801*     | KAH0783203.1        | 679         |
|                       |                |                                                     |                        | KY284_002912*     | KAH0727047.1        | 679         |
| StARF2a               | LOC102582348*  | XP_006341482.1                                      | 845                    | KY284_018915*     | KAH0688362.1        | 849         |
| StARF2b               | LOC102594206*  | XP_006346635.1                                      | 829                    | KY284_012253*     | KAH0710826.1        | 829         |
|                       |                |                                                     |                        | KY289_010799*     | KAH0705723.1        | 829         |
| StARF13               | LOC102587577   | <u>XP_015163537.1/38.1/39.1</u>                     | <u>650/645/573</u>     | KY285_025646      | <u>KAH0677845.1</u> | <u>657</u>  |
| StARF18a              | LOC102586095*  | XP_006339723.1/24.1/25.1                            | 708/705/695            | KY289_002568*     | KAH0731380.1        | 687         |
|                       |                |                                                     |                        | KY284_002456*     | KAH0726591.1        | 687         |
| StARF18b              | LOC102605272*  | XP_006343828.1                                      | 655                    | KY289_012319*     | KAH0707243.1        | 650         |
| StARF18c              | LOC102582092*  | XP_006352240.1/41.1/<br><u>XP_015166335.1</u>       | 685/683/ <u>586</u>    | KY284_034399*     | KAH0646515.1        | 685         |
|                       |                |                                                     |                        | KY289_032705*     | KAH0641731.1        | 685         |
| <b>ETTs</b>           | 2(0)           |                                                     |                        | 7(1)              |                     |             |
| StARF3                | LOC102582172** | <u>XP_006364312.1/13.1/15.1</u>                     | <u>748/748/747</u>     | KY284_013906**    | <u>KAH0699691.1</u> | <u>747</u>  |
|                       |                |                                                     |                        | KY289_014561**    | <u>KAH0697079.1</u> | <u>793</u>  |
|                       |                |                                                     |                        | KY290_014506**    | <u>KAH0770525.1</u> | <u>883</u>  |
|                       |                |                                                     |                        | KY285_015336**    | <u>KAH0719305.1</u> | <u>747</u>  |
| StARF4                | LOC102602099*  | <u>XP_006340145.1</u>                               | <u>811</u>             | KY289_009905*     | KAH0713946.1        | 811         |
|                       |                |                                                     |                        | KY284_008438*     | KAH0715533.1        | 811         |
|                       |                |                                                     |                        | KY285_009231*     | KAH0747574.1        | 811         |
| <b>Abnormal ARFs</b>  | 6(0)           |                                                     |                        | 17(0)             |                     |             |
| StARF10a              | LOC102586871   | <u>XP_006340187.1/88.1/<br/>XP_015170635.1/37.1</u> | <u>699/699/696/696</u> | KY290_008530      | <u>KAH0777119.1</u> | <u>699</u>  |
|                       |                |                                                     |                        | KY284_008460      | <u>KAH0715555.1</u> | <u>699</u>  |
| StARF10b              | LOC102599257   | <u>XP_006365732.1</u>                               | <u>676</u>             | KY284_028218      | <u>KAH0663287.1</u> | <u>676</u>  |
|                       |                |                                                     |                        | KY285_029414      | <u>KAH0668208.1</u> | <u>676</u>  |
|                       |                |                                                     |                        | KY289_029555      | <u>KAH0660807.1</u> | <u>676</u>  |
| StARF10c              | LOC102585790   | <u>XP_006363667.1</u>                               | <u>648</u>             | KY289_006066      | <u>KAH0723022.1</u> | <u>641</u>  |
|                       |                |                                                     |                        | KY284_005740      | <u>KAH0720710.1</u> | <u>642</u>  |
| StARF11               | LOC102584504   | <u>XP_006367077.2</u>                               | <u>190</u>             | KY284_017614      | <u>KAH0687061.1</u> | <u>197</u>  |
|                       |                |                                                     |                        | KY285_017608      | <u>KAH0703330.1</u> | <u>151</u>  |
|                       |                |                                                     |                        | KY290_018647      | <u>KAH0762574.1</u> | <u>194</u>  |
|                       |                |                                                     |                        | KY289_017768      | <u>KAH0690410.1</u> | <u>198</u>  |
| StARF16               | LOC102592252   | <u>XP_006354327.1</u>                               | <u>696</u>             | KY289_017768      | <u>KAH0635551.1</u> | <u>694</u>  |
|                       |                |                                                     |                        | KY290_035963      | <u>KAH0737258.1</u> | <u>694</u>  |
|                       |                |                                                     |                        | KY285_037550      | <u>KAH0640964.1</u> | <u>694</u>  |
| StARF17               | LOC102588218   | <u>XP_006364958.1</u>                               | <u>602</u>             | KY284_009116      | <u>KAH0716211.1</u> | <u>602</u>  |
|                       |                |                                                     |                        | KY285_009060      | <u>KAH0747403.1</u> | <u>602</u>  |
|                       |                |                                                     |                        | KY290_009178      | <u>KAH0777767.1</u> | <u>591</u>  |

\* and \*\* means that the gene presumably belongs to canonical or alternative auxin signaling system, respectively.

**Table S1 (continuation 2).** Potato genes/proteins presumably involved in auxin signaling, exemplified by DM 'Phureja' and tetraploid 'Otava' cultivars

| Gene name                   | Gene symbol DM  | Protein DM     | Amino acids | Gene symbol Otava | Protein Otava | Amino acids |
|-----------------------------|-----------------|----------------|-------------|-------------------|---------------|-------------|
| <b>Canonical Aux/IAAs I</b> | 16              |                |             | 39                |               |             |
| StIAA1                      | LOC102577658*   | NP_001275473.1 | 349         | KY289_021579*     | KAH0683827.1  | 384         |
|                             |                 |                |             | KY284_021361*     | KAH0680276.1  | 349         |
|                             |                 |                |             | KY285_022426*     | KAH0695329.1  | 400         |
| StIAA2                      | 102586718/IAA2* | NP_001275031.1 | 213         | KY285_027087*     | KAH0665881.1  | 213         |
|                             |                 |                |             | KY290_028122*     | KAH0748890.1  | 213         |
|                             |                 |                |             | KY284_027103*     | KAH0662172.1  | 213         |
| StIAA3                      | 102577631/IAA3* | NP_001275398.1 | 249         | KY284_004248*     | KAH0728383.1  | 499         |
|                             |                 |                |             | KY289_004459*     | KAH0733271.1  | 499         |
| StIAA4                      | LOC102596255*   | XP_006356050.2 | 213         | KY284_015710*     | KAH0685157    | 189         |
|                             |                 |                |             | KY285_015711*     | KAH0701433    | 189         |
|                             |                 |                |             | KY290_016407*     | KAH0760334    | 189         |
| StIAA6                      | LOC102599665*   | XP_006343104.1 | 195         | KY289_019200*     | KAH0691842    | 193         |
| StIAA7                      | LOC102599338*   | XP_006343103.2 | 212         | KY284_018141*     | KAH0687588.1  | 212         |
|                             |                 |                |             | KY289_018299*     | KAH0690941.1  | 216         |
| StIAA8                      | LOC102595402*   | XP_006343091.1 | 278         | KY290_019205*     | KAH0763132.1  | 262         |
|                             |                 |                |             | KY284_018152*     | KAH0687599.1  | 266         |
|                             |                 |                |             | KY289_018306*     | KAH0690948.1  | 366         |
|                             |                 |                |             | KY285_018168*     | KAH0703890.1  | 347         |
| StIAA10                     | LOC102587812*   | XP_006366663.1 | 214         | KY289_029132*     | KAH0660384.1  | 214         |
|                             |                 |                |             | KY284_026025*     | KAH0661094.1  | 214         |
|                             |                 |                |             | KY285_025922*     | KAH0664716.1  | 214         |
| StIAA11                     | LOC102587488*   | XP_006366662.1 | 190         | KY284_026026*     | KAH0661095.1  | 190         |
|                             |                 |                |             | KY285_025923*     | KAH0664717.1  | 190         |
| StIAA12                     | LOC102586390*   | XP_006350661.1 | 190         | KY285_027088*     | KAH0665882.1  | 190         |
|                             |                 |                |             | KY289_027289*     | KAH0658541.1  | 190         |
|                             |                 |                |             | KY290_028123*     | KAH0748891.1  | 190         |
| StIAA14                     | LOC102583557*   | XP_006356170.1 | 176         | KY290_028702*     | KAH0749470.1  | 135         |
|                             |                 |                |             | KY284_027702*     | KAH0662771.1  | 136         |
|                             |                 |                |             | KY285_027711*     | KAH0666505.1  | 139         |
| StIAA15                     | LOC102590668*   | XP_006352755.1 | 153         | KY284_028530*     | KAH0663599.1  | 159         |
| StIAA21                     | LOC102578779*   | XP_006349740.1 | 183         | KY284_036577*     | KAH0633791.1  | 182         |
| StIAA22                     | LOC102592864*   | XP_006362194.1 | 195         | KY289_038044*     | KAH0638129.1  | 195         |
|                             |                 |                |             | KY285_036949*     | KAH0640363.1  | 195         |
| StIAA23                     | LOC102593208*   | XP_006362195.1 | 238         | KY284_036993*     | KAH0634207.1  | 239         |
|                             |                 |                |             | KY285_036950*     | KAH0640364.1  | 236         |
| StIAA25                     | LOC102577929*   | XP_006353472.1 | 297         | KY285_011423*     | KAH0735716.1  | 295         |
|                             |                 |                |             | KY284_011464*     | KAH0710037.1  | 373         |
|                             |                 |                |             | KY290_011378*     | KAH0774241.1  | 295         |
|                             |                 |                |             | KY289_012904*     | KAH0707828.1  | 295         |

\* and \*\* means that the gene presumably belongs to canonical or alternative auxin signaling system, respectively.

**Table S1 (continuation 3).** Potato genes/proteins presumably involved in auxin signaling, exemplified by DM 'Phureja' and tetraploid 'Otava' cultivars

| Gene name                    | Gene symbol DM | Protein DM                                  | Amino acids             | Gene symbol Otava | Protein Otava | Amino acids |
|------------------------------|----------------|---------------------------------------------|-------------------------|-------------------|---------------|-------------|
| <b>Abnormal IAA28-like</b>   | 1              |                                             |                         | 3                 |               |             |
| StIAA9                       | LOC102585218   | XP_015162257.1                              | 283                     | KY290_019252      | KAH0763179.1  | 283         |
|                              |                |                                             |                         | KY284_018202      | KAH0687649.1  | 283         |
|                              |                |                                             |                         | KY289_018356      | KAH0690998.1  | 283         |
| <b>Canonical Aux/IAAs II</b> | 3              |                                             |                         | 8                 |               |             |
| StIAA20                      | LOC102585970*  | XP_006355888.1                              | 322                     | KY285_036436*     | KAH0639850.1  | 323         |
|                              |                |                                             |                         | KY284_036466*     | KAH0633680.1  | 323         |
| StIAA24                      | LOC102581585*  | XP_006340886.1/<br>XP_015160844.1           | 283/282                 | KY290_037732*     | KAH073902.1   | 282         |
|                              |                |                                             |                         | KY284_037108*     | KAH0634322.1  | 322         |
|                              |                |                                             |                         | KY285_037848*     | KAH0641262.1  | 282         |
| StIAA26                      | LOC102591186*  | XP_015162035.1/<br>XP_006342408.1           | 232/231                 | KY289_012606*     | KAH0707530.1  | 363         |
|                              |                |                                             |                         | KY285_012080*     | KAH0736373.1  | 363         |
|                              |                |                                             |                         | KY284_009720*     | KAH0708293.1  | 363         |
| <b>NC IAA32-like</b>         | 1              |                                             |                         | 3                 |               |             |
| StIAA32                      | LOC102582938** | XP_006344317.1                              | 192                     | KY284_022967**    | KAH0671880.1  | 191         |
|                              |                |                                             |                         | KY285_025320**    | KAH0677519.1  | 191         |
|                              |                |                                             |                         | KY289_023159**    | KAH0668666.1  | 191         |
| <b>Abnormal IAA29-like</b>   | 3              |                                             |                         | 3                 |               |             |
| StIAA13                      | LOC102585622   | XP_006353683.1                              | 237                     |                   |               |             |
| StIAA16                      | LOC102583661   | XP_006358296.1                              | 203                     | KY289_032336      | KAH0654658.1  | 203         |
|                              |                |                                             |                         | KY284_029800      | KAH0649888.1  | 203         |
| StIAA19                      | LOC102602017** | XP_006343525.1                              | 219                     | KY289_034747      | KAH0643773.1  | 79          |
| <b>NC IAA33-like</b>         |                |                                             |                         |                   |               |             |
| StIAA17                      | LOC102602445** | XP_006341262.1                              | 143                     |                   |               |             |
| <b>TPL-related</b>           | 6              |                                             |                         | 14                |               |             |
| StTPL                        | LOC102581018*  | XP_015161654.1/55.1/56.1                    | 1132/1132/1130          | KY284_018894*     | KAH0688341.1  | 1130        |
| StTPR4a                      | LOC102602466*  | XP_006364222.1/<br>XP_015159310.1           | 1132/1130               | KY290_019978*     | KAH0763905.1  | 1132        |
|                              |                |                                             |                         | KY284_018884*     | KAH0688331.1  | 1179        |
| StTPR4b                      | LOC102582783*  | XP_006358293.1/94.1                         | 1134/1133               | KY289_031993*     | KAH0654315.1  | 1133        |
|                              |                |                                             |                         | KY285_029831*     | KAH0654949    | 1134        |
|                              |                |                                             |                         | KY284_029802*     | KAH0649890.1  | 1134        |
| StTRP2                       | LOC102596120*  | XP_006352935.1/36.1                         | 1136                    | KY284_034652*     | KAH0646768.1  | 1135        |
|                              |                |                                             |                         | KY290_035374*     | KAH0742331.1  | 1135        |
|                              |                |                                             |                         | KY289_033825*     | KAH0642851.1  | 1116        |
| StTPR3                       | LOC102590171*  | XP_006344707.1/08.1/09.9                    | 1155/1132/1131          | KY285_004104*     | KAH0768233.1  | 1142        |
|                              |                |                                             |                         | KY290_002655*     | KAH0783057.1  | 1143        |
|                              |                |                                             |                         | KY289_002850*     | KAH0731662.1  | 1143        |
| StTPR5                       | LOC102596956*  | XP_006343510.1/11.1/<br>XP_015162492.1/93.1 | 1180/1142/<br>1142/1066 | KY289_025981*     | KAH0671488.1  | 1180        |
|                              |                |                                             |                         | KY284_032787*     | KAH0644903.1  | 1180        |

\* and \*\* means that the gene presumably belongs to canonical or alternative auxin signaling system, respectively. StIAA17 and StIAA32 may be pseudogene.



**Table S1 (ending).** Potato genes/proteins presumably involved in auxin signaling, exemplified by DM 'Phureja' and tetraploid 'Otava' cultivars

| Gene name                  | Gene symbol DM | Protein DM            | Amino acids | Gene symbol Otava | Protein Otava       | Amino acids |
|----------------------------|----------------|-----------------------|-------------|-------------------|---------------------|-------------|
| <b>SKP2A/B</b>             | 1              |                       |             | 2                 |                     |             |
| StSKP2A/B                  | LOC102579014** | XP_015168274.1        | 365         | KY289_021131**    | KAH0683379.1        | 365         |
|                            |                |                       |             | KY284_020964**    | KAH0679879.1        | 365         |
| <b>ABP1</b>                | 1              |                       |             | 4                 |                     |             |
| StABP1                     | LOC102602619** | XP_006352791.1        | 202         | KY284_029397**    | KAH0664466.1        | 227         |
|                            |                |                       |             | KY289_029621**    | KAH0660873.1        | 207         |
|                            |                |                       |             | KY285_028614**    | KAH0667408.1        | 164         |
|                            |                |                       |             | KY290_029562**    | KAH0750330.1        | 164         |
| <b>TMK1 related</b>        | 9(8)           |                       |             | 23                |                     |             |
| StTMK1a                    | LOC102605763** | XP_006350960.1        | 938         | KY289_007645**    | KAH0711686.1        | 938         |
|                            |                |                       |             | KY284_007373**    | KAH0714468.1        | 938         |
| StTMK1b                    | LOC102589646** | XP_006346490.1        | 942         | KY289_004663**    | KAH0733475.1        | 942         |
| StTMK1c                    | LOC102589646   | <u>XP_015163711.1</u> | 468         | KY289_004663**    | KAH0733475.1        | 942         |
| StTMK4a                    | LOC102599434** | XP_006360918.1        | 932         | KY289_037438**    | KAH0637523.1        | 932         |
|                            |                |                       |             | KY289_004663**    | KAH0733475.1        | 942         |
|                            |                |                       |             | KY284_037238**    | KAH0634452.1        | 932         |
| StTMK4b                    | LOC102578437** | XP_006349904.1        | 921         | KY285_009583**    | KAH0733876.1        | 921         |
|                            |                |                       |             | KY289_013042**    | KAH0707966.1        | 921         |
| StTMK4c                    | LOC102581637** | XP_006366998.2        | 942         | KY284_036272**    | KAH0633486.1        | 942         |
|                            |                |                       |             | KY289_037918**    | KAH0638003.1        | 942         |
|                            |                |                       |             | KY290_036914**    | KAH0738209.1        | 942         |
|                            |                |                       |             | KY285_036254**    | KAH0639668.1        | 942         |
| StTMK5a                    | LOC102585650** | XP_006339166.1        | 934         | KY284_006756**    | KAH0721726.1        | 934         |
|                            |                |                       |             | KY289_007063**    | KAH0724019.1        | 934         |
| StTMK5b                    | LOC102579753** | XP_006348472.1        | 963         | KY290_000207**    | KAH0780609.1        | 955         |
|                            |                |                       |             | KY284_000216**    | KAH0724351.1        | 955         |
|                            |                |                       |             | KY285_000195**    | KAH0764324.1        | 955         |
|                            |                |                       |             | KY289_004026**    | KAH0732838.1        | 955         |
| StTMK5c                    | LOC102605581** | XP_006361096.1        | 978         | KY289_029533**    | KAH0660785.1        | 978         |
|                            |                |                       |             | KY285_028177**    | KAH0666971.1        | 977         |
|                            |                |                       |             | KY284_028131**    | KAH0663200.1        | 978         |
|                            |                |                       |             | KY290_029130**    | KAH0749898.1        | 938         |
| <b>MPK1/2/7/14 related</b> | 2              |                       |             | 4(2)              |                     |             |
| StMPK_1                    | LOC102601775** | XP_006341972.1        | 372         | KY285_027891**    | <u>KAH0666685.1</u> | 234         |
|                            |                |                       |             | KY289_029745**    | <u>KAH0660997.1</u> | 264         |
| StMPK_2                    | LOC102592852** | XP_006340663.1        | 370         | KY290_015059**    | KAH0771078.1        | 370         |
|                            |                |                       |             | KY285_014474**    | KAH0718443.1        | 392         |

\* and \*\* means that the gene presumably belongs to canonical or alternative auxin signaling system, respectively.

**Table S2.** Spearman correlation coefficients [R\_{s}] between expression patterns of DM-RH different groups of genes, which presumably take part in auxin signaling

| Genes       | Organs  |         |         |         |         |          |
|-------------|---------|---------|---------|---------|---------|----------|
|             | Leaves  | Roots   | Stolons | Tubers  | Flowers | Petioles |
| All         | 0,709** | 0,755** | 0,662** | 0,813** | 0,806** | 0,804**  |
| Canonic     | 0,716** | 0,714** | 0,464** | 0,766** | 0,933** | 0,711**  |
| Non-canonic | 0,743** | 0,816** | 0,885** | 0,852** | 0,63**  | 0,887**  |

\*\* means highly significant correlation ( $P < 0.01$ )

**Table S3.** Primers for RT-qPCR

| Locus          | Gene           | Name        | Primer                  |
|----------------|----------------|-------------|-------------------------|
| LOC102583018   | XP_006352806.1 | StTIR1a LP  | GAAGTGTGGCTGGACGAAGA    |
|                |                | StTIR1a RP  | GCGCTAATACCTGCCCATCT    |
| LOC102578728   | XP_006359432.1 | StTIR1b LP  | CTTCAGCTCCACACACTCC     |
|                |                | StTIR1b RP  | ACTGTACGGAAATGGGGTGC    |
| LOC102578999   | XP_006362983.1 | StTIR1c LP  | TCACACGCTTCCCTCAACTC    |
|                |                | StTIR1c RP  | GAAGATAGGCACCCCATCCG    |
| LOC102578575   | XP_006338135.1 | StAFB4 LP   | TGTGACGAAGGACTTGAGGC    |
|                |                | StAFB4 RP   | ACCTGCTTCAGAACTGGGG     |
| LOC102595865   | XP_006347140.1 | StAFB6 LP   | AACGTCACCTTGCCTCAGTT    |
|                |                | StAFB6 RP   | TGCATACTGCCGACTTGTGA    |
| LOC102590158   | XP_006342026.1 | SARF5 LP    | TGATCTTCCAACAGCGAGTG    |
|                |                | StARF5 RP   | ATGAGGAATGAGCCATGGAG    |
| LOC102606235   | XP_006357892.1 | StARF6a LP  | ATATCTCAGGCGCAGATGCT    |
|                |                | StARF6a RP  | TGCGAGTTCACCTTCTTGGTG   |
| LOC102598513   | XP_006350451.1 | StARF8b LP  | ACATGGTGGCTTTTCTGTCC    |
|                |                | StARF8b RP  | TGGCGCTAACAAACACACTC    |
| LOC102594021   | XP_006353789.1 | StARF19a LP | TGCCCAGCCAAATCAGCATA    |
|                |                | StARF19a RP | ACTGGGTTGTTTCATCCGCT    |
| LOC102582348   | XP_006341482.1 | StARF2a LP  | ACCTTTAGGGAGGCCTGAGT    |
|                |                | StARF2a RP  | CCAGGAGCTTTTGAGCCAGA    |
| LOC102586095   | XP_006339723.1 | StARF18a LP | GTTCTTGCCACTGCATCTCA    |
|                |                | StARF18a RP | CATGACTCACAGCCTCCAGA    |
| LOC102602099   | XP_006340145.1 | StARF4 LP   | TGATAAACCAGTCCGCCCAC    |
|                |                | StARF4 RP   | AGGTTTTCCCAAGCACCAA     |
| 102586718/IAA2 | NP_001275031.1 | StIAA2 LP   | GGTCCCAAGGAATGATAGA     |
|                |                | StIAA2 RP   | AGTCCAATGGCTTCTGATC     |
| 102577631/IAA3 | NM_001275398.1 | StIAA3 LP   | ATTGTGGGACTCAAGGATT     |
|                |                | StIAA3 RP   | ACAAACATCTCCCAAGGTA     |
| LOC102595402   | XP_006343091.1 | StIAA8 LP   | GGATGCTAGTCGGCGATGTT    |
|                |                | StIAA8 RP   | TCACAGGACATACCTAGCCCA   |
| LOC102593208   | XP_006362195.1 | StIAA23 LP  | TGGAGATTGGATGCTTGTG     |
|                |                | StIAA23 RP  | TAGCTCTTGGTGCAAGTCCA    |
| LOC102577929   | XP_006353472.1 | StIAA25 LP  | GTGATTGGATGCTTGTCTGGTG  |
|                |                | StIAA25 RP  | TGGCTCTTGGAGCTAGACCAT   |
| LOC102586390   | XP_006350661.1 | StIAA12 LP  | TCATCATGTAAGAGGCTAA     |
|                |                | StIAA12 RP  | CACTTCCCAATCAGTGTA      |
| LOC102590668   | XP_006352755.1 | StIAA15 LP  | TAGAAGCGAGCTACGTAA      |
|                |                | StIAA15 RP  | CATATCCCAAGGTACATCA     |
| LOC102602619   | XM_006352729.2 | StABP1 LP   | ACTGGTCAATGCCACACACA    |
|                |                | StABP1 RP   | AGCTCGTCTTTCCTCGTTGTT   |
| LOC102605763   | XM_006350898.2 | StTMK1 LP   | ATGCCTTTACTGGTCCCG      |
|                |                | StTMK1 RP   | CCTTTGAACACCGGCATTGG    |
| LOC102590845   | XM_006364198.2 | StSPK1 LP   | TCCGAGTAAGGCAAAAGGGT    |
|                |                | StSPK1 RP   | TGCTCCAGTGCCATTGACTT    |
| LOC102579014   | XM_015312788.1 | StSKP2a LP  | CTCGATCTGTGTGGCTGTGT    |
|                |                | StSKP2aRP   | TAGGCCGAGGGATCTCAAGT    |
| LOC102601775   | XM_006341910.2 | StMPK14 LP  | ACTGCTTGTGATGTCTATCGGAA |
|                |                | StMPK14 RP  | AATGAGATGTGGGAGGGTG     |
| LOC102581018   | XM_015306170.1 | StTPL LP    | AGCAAAGATGGGGAATCGCA    |
|                |                | StTPL RP    | CACCCAGCGATCTTTTCCGA    |

# Supplementary figures

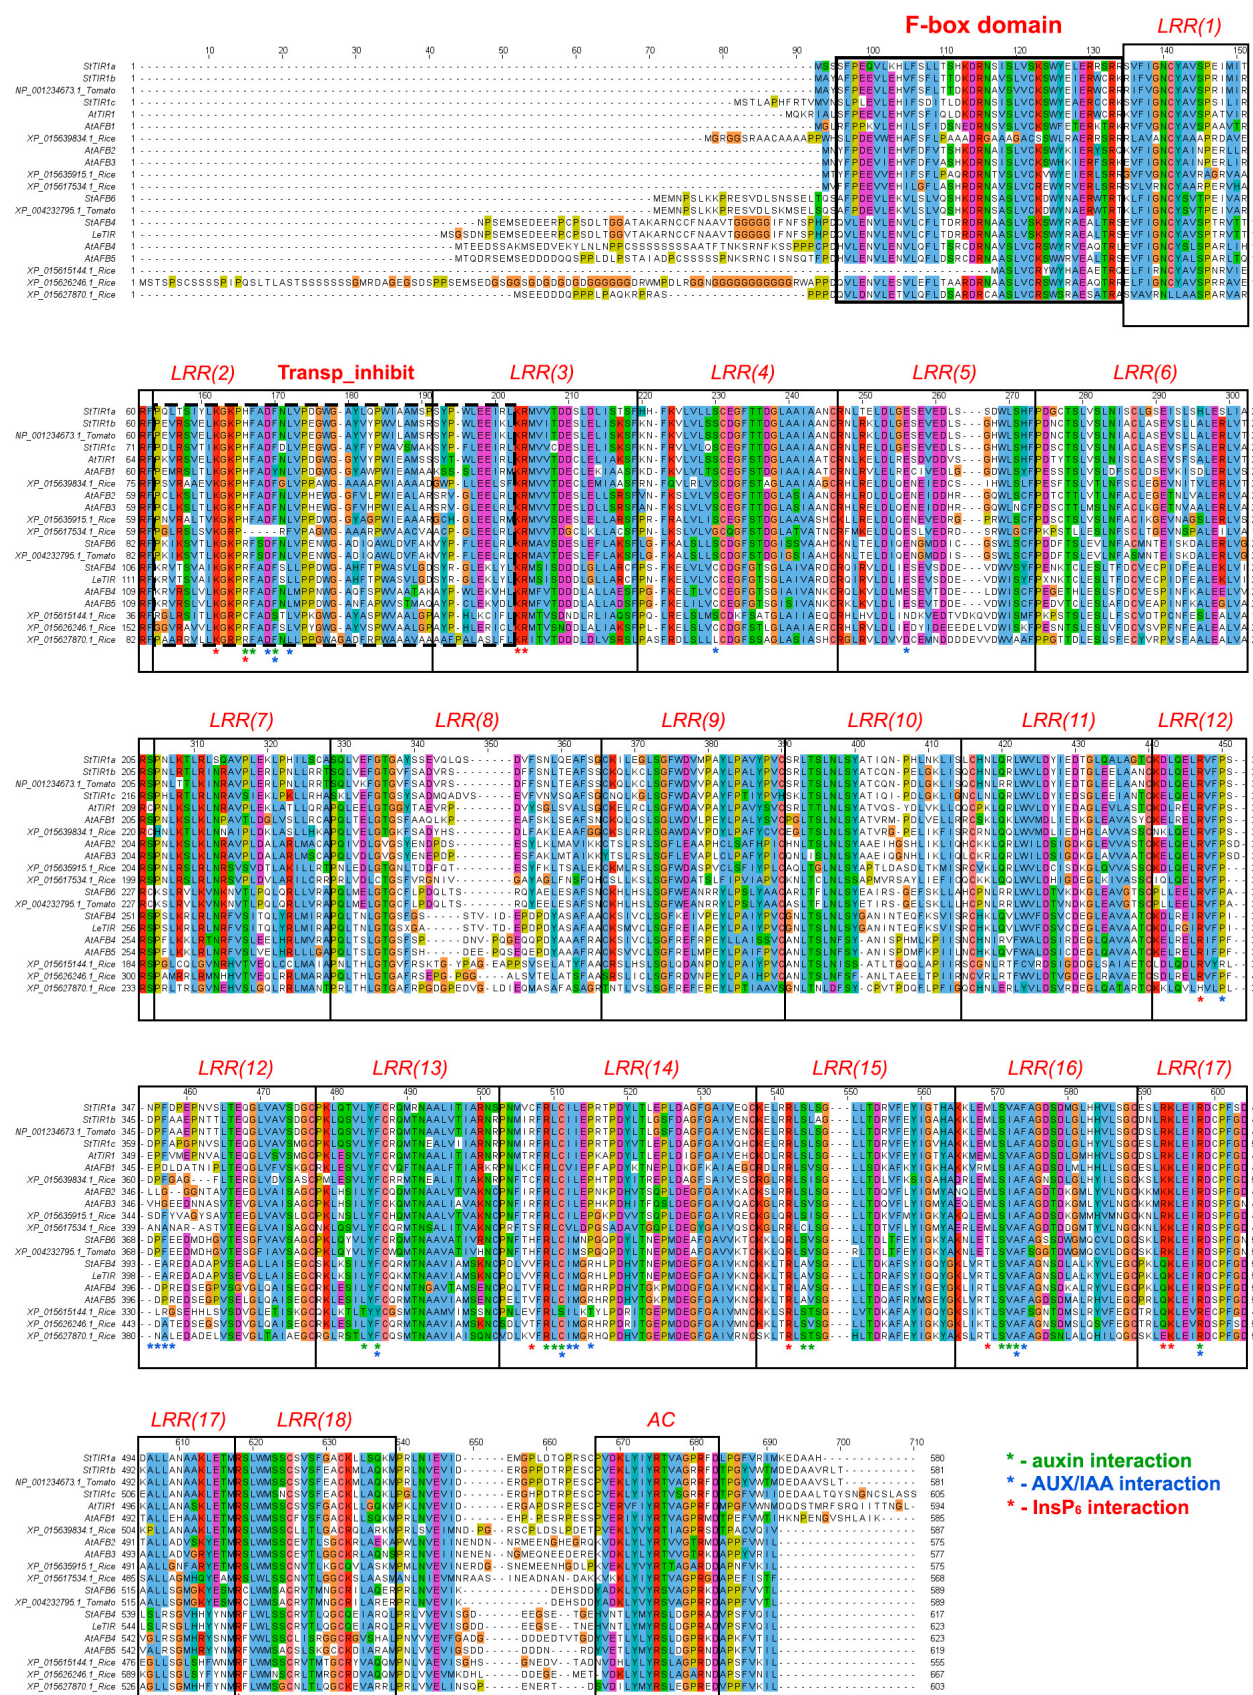

Figure S1. TIR1/AFB ortholog sequence alignment.



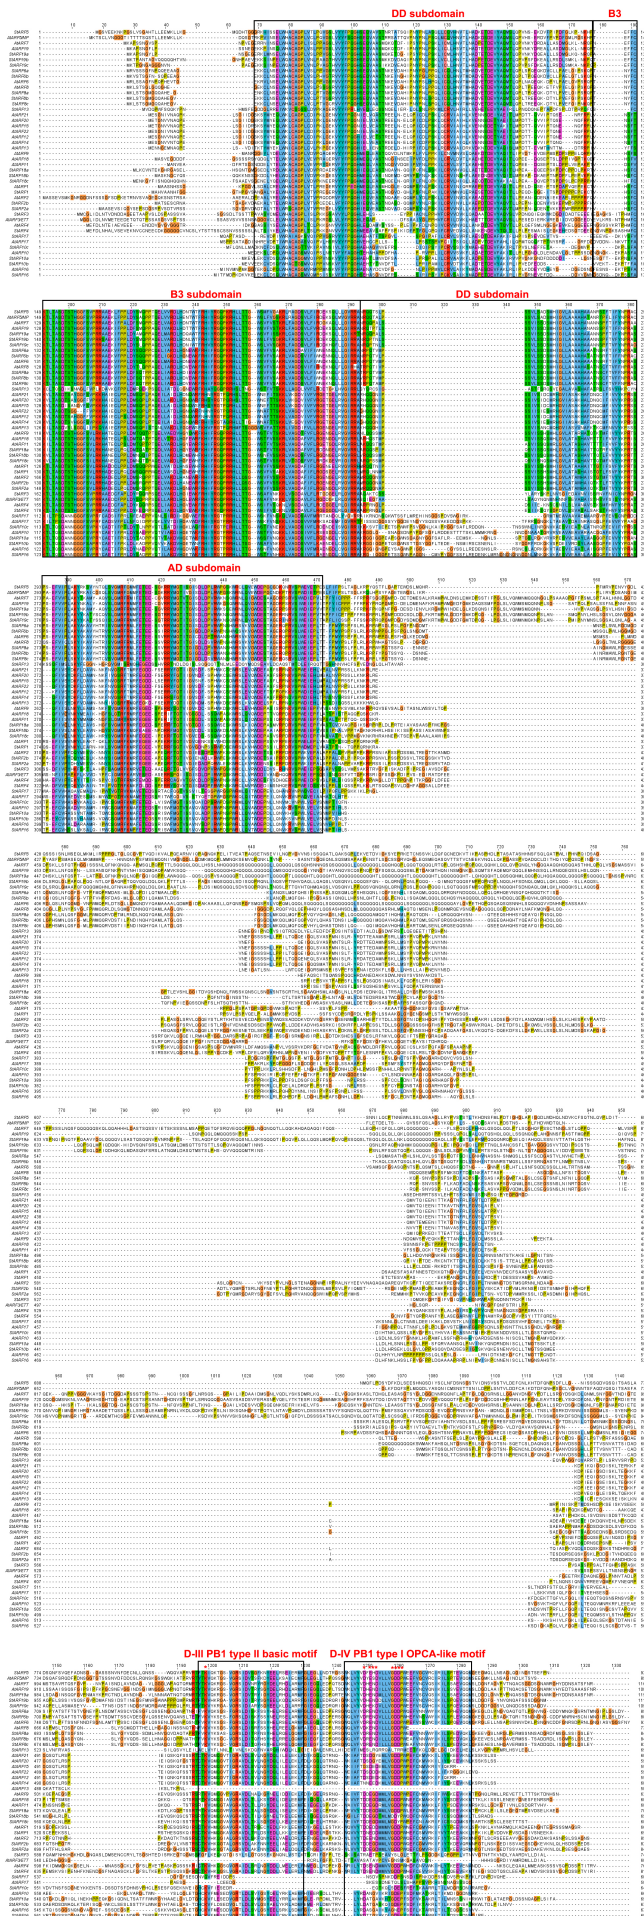

Figure S2. ARF ortholog sequence alignment.

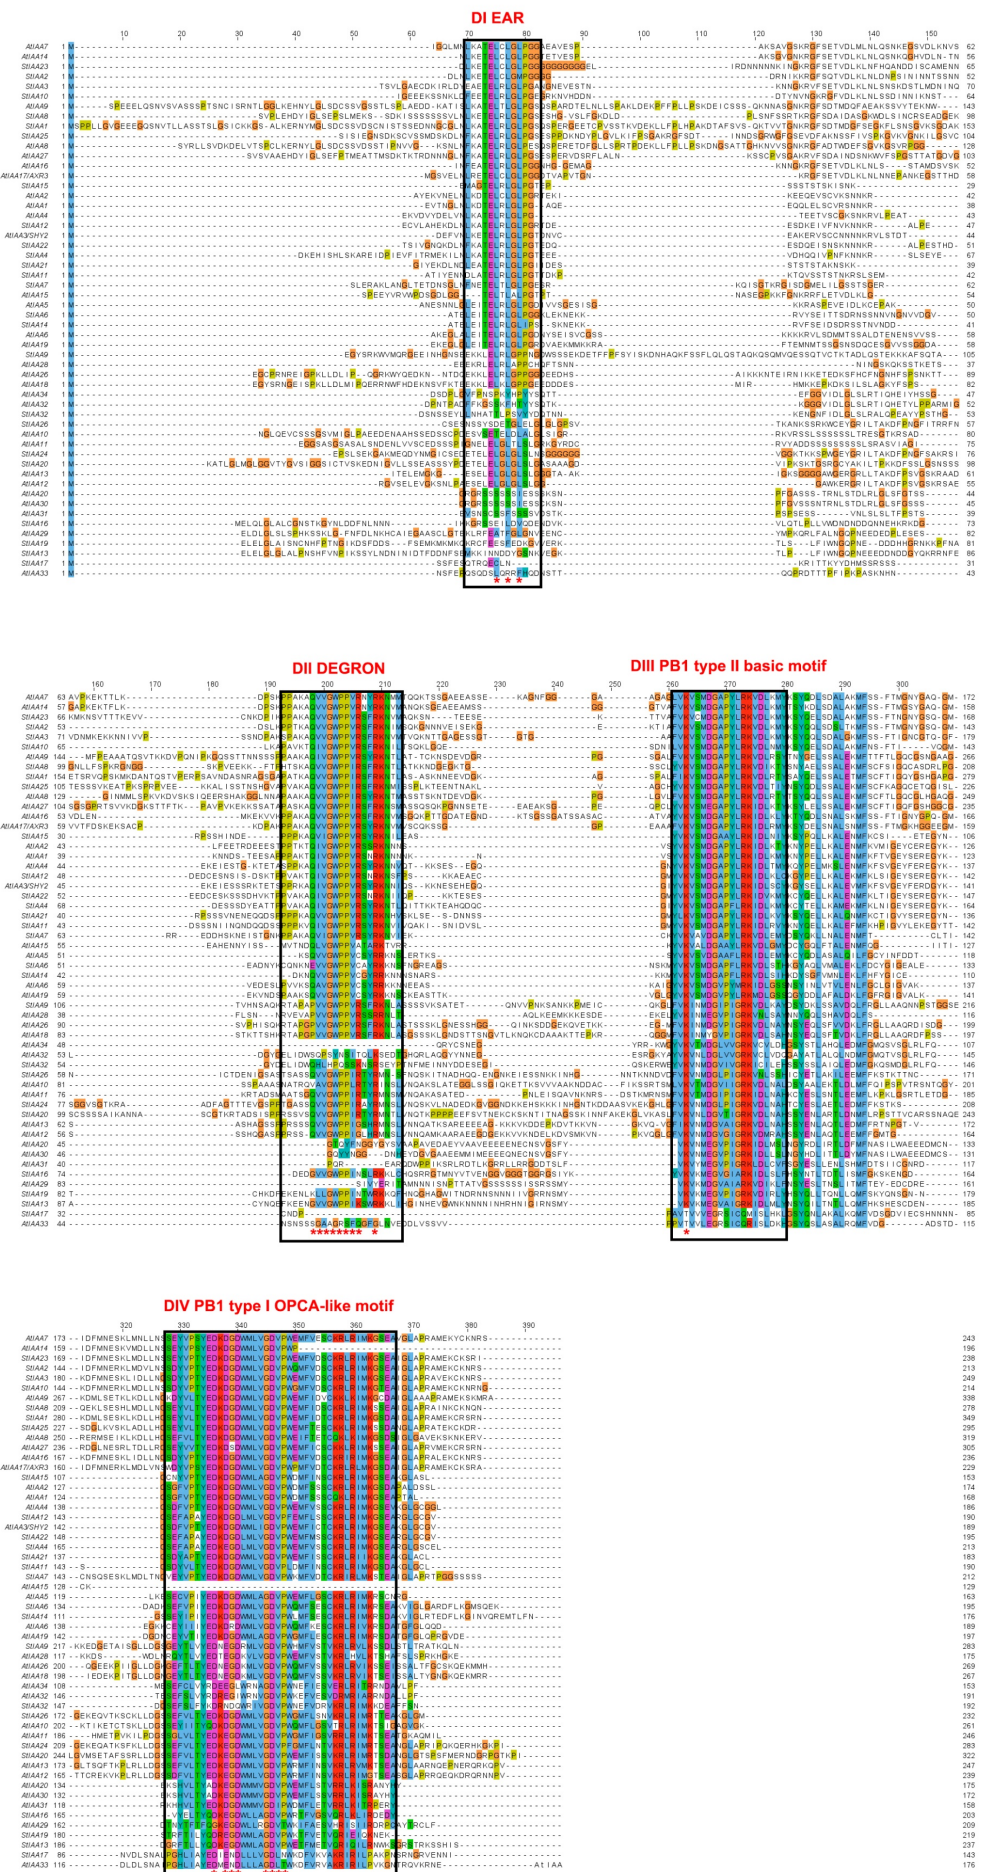

Figure S3. Aux/IAA ortholog sequence alignment.



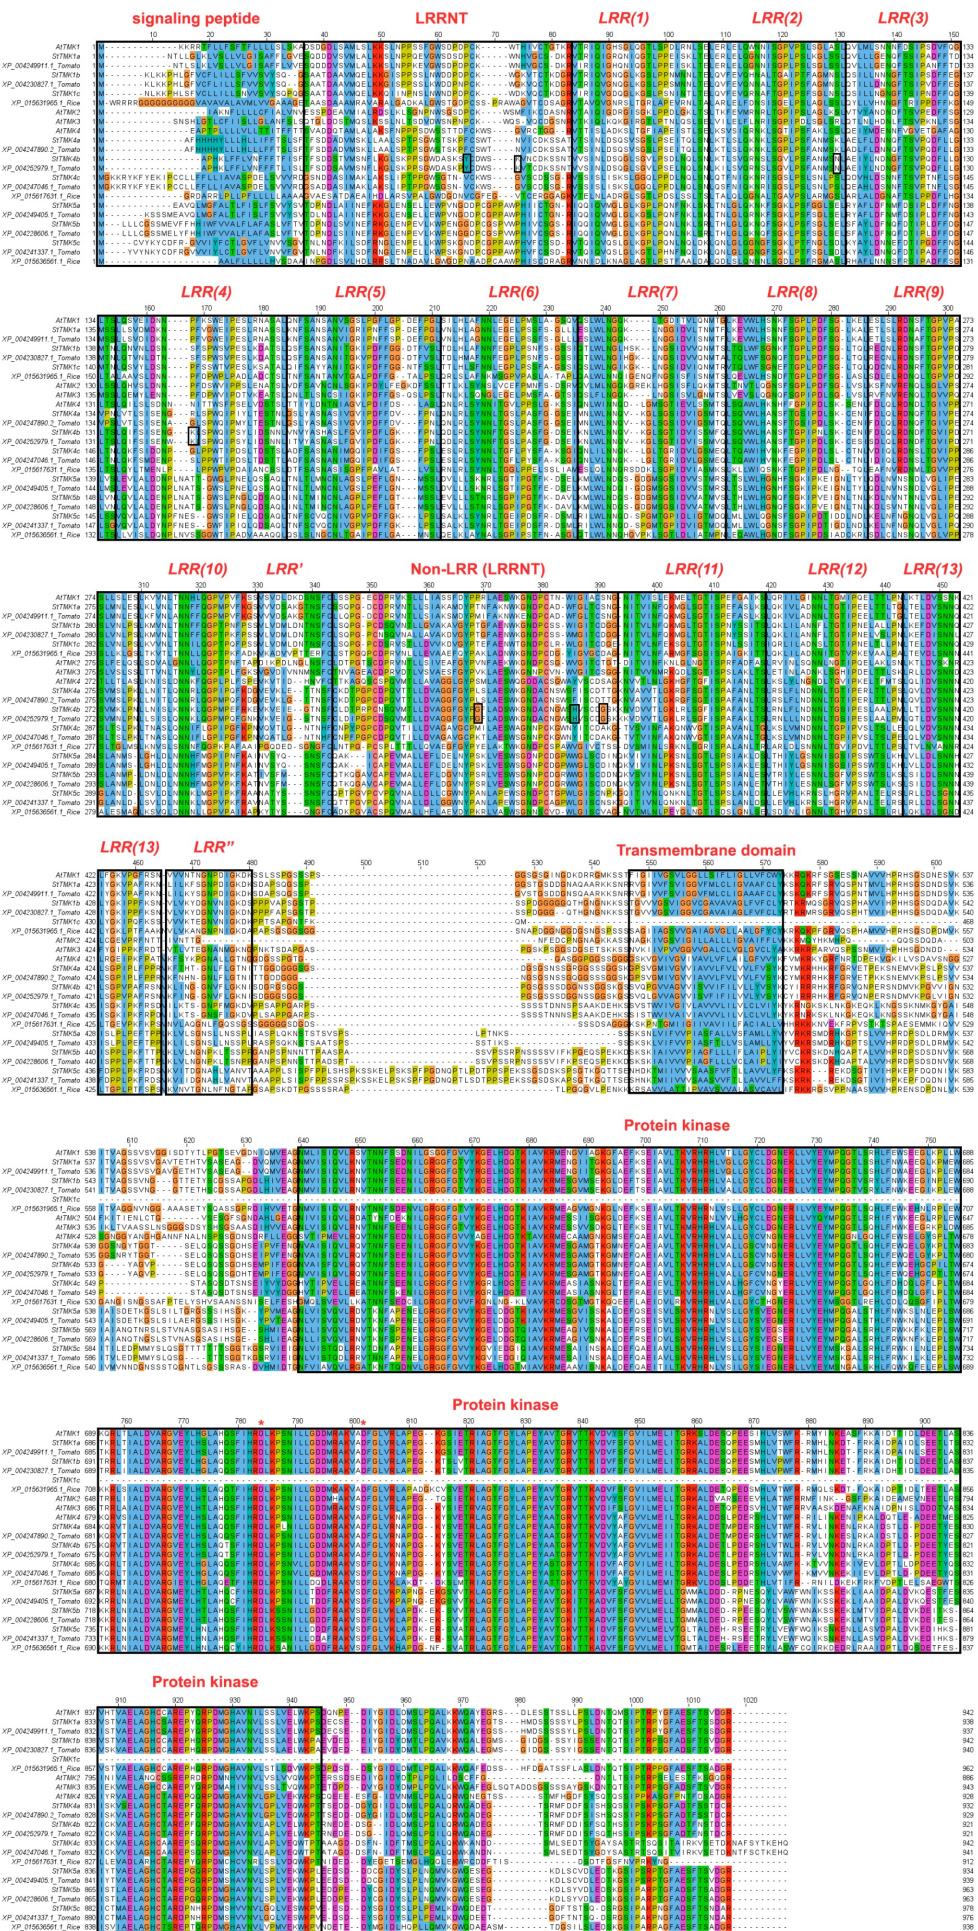

**Figure S4.** TMK ortholog sequence alignment.

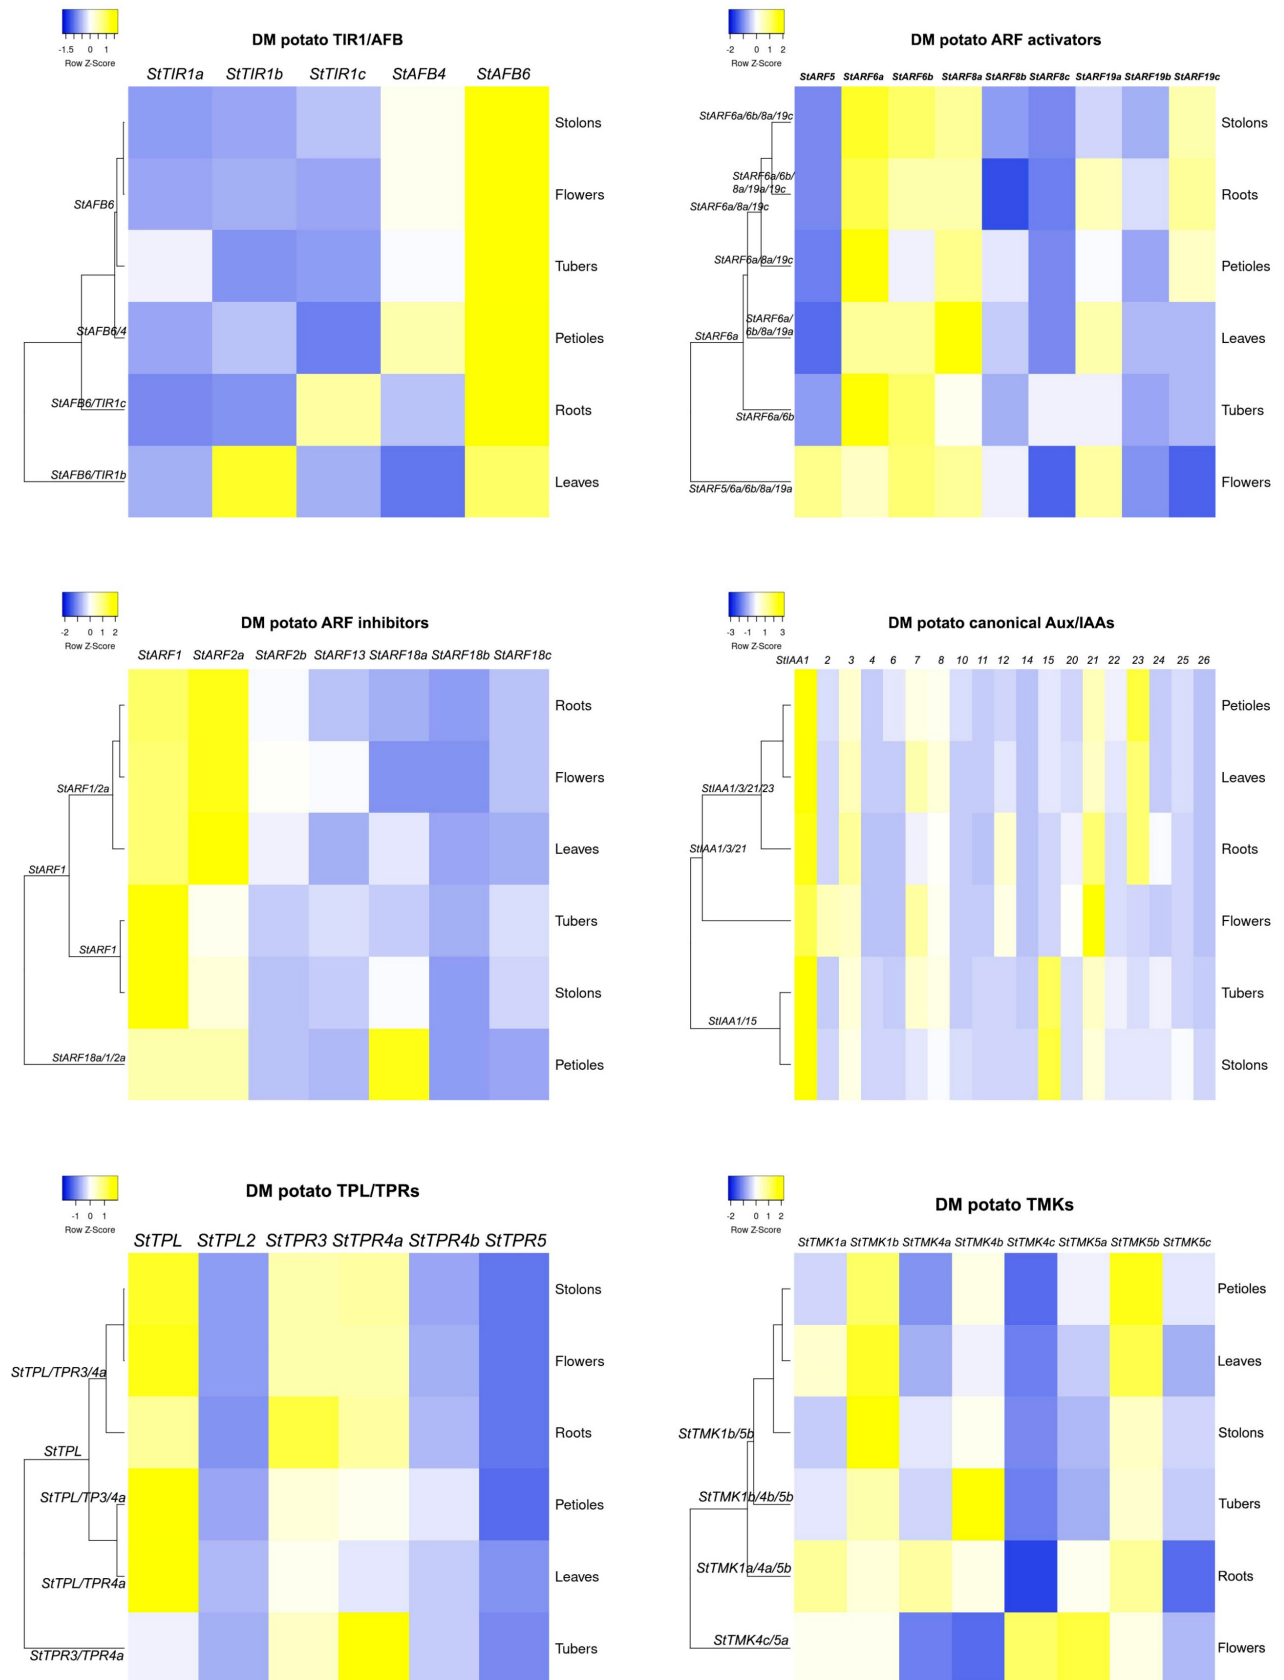

**Figure S5.** Cluster analysis of DM genes expression (described in Methods). Relative expression data are given by row. Yellow corresponds to high activity, blue to low activity. Branches characterized by preferential expression of the corresponding signaling components are signed.



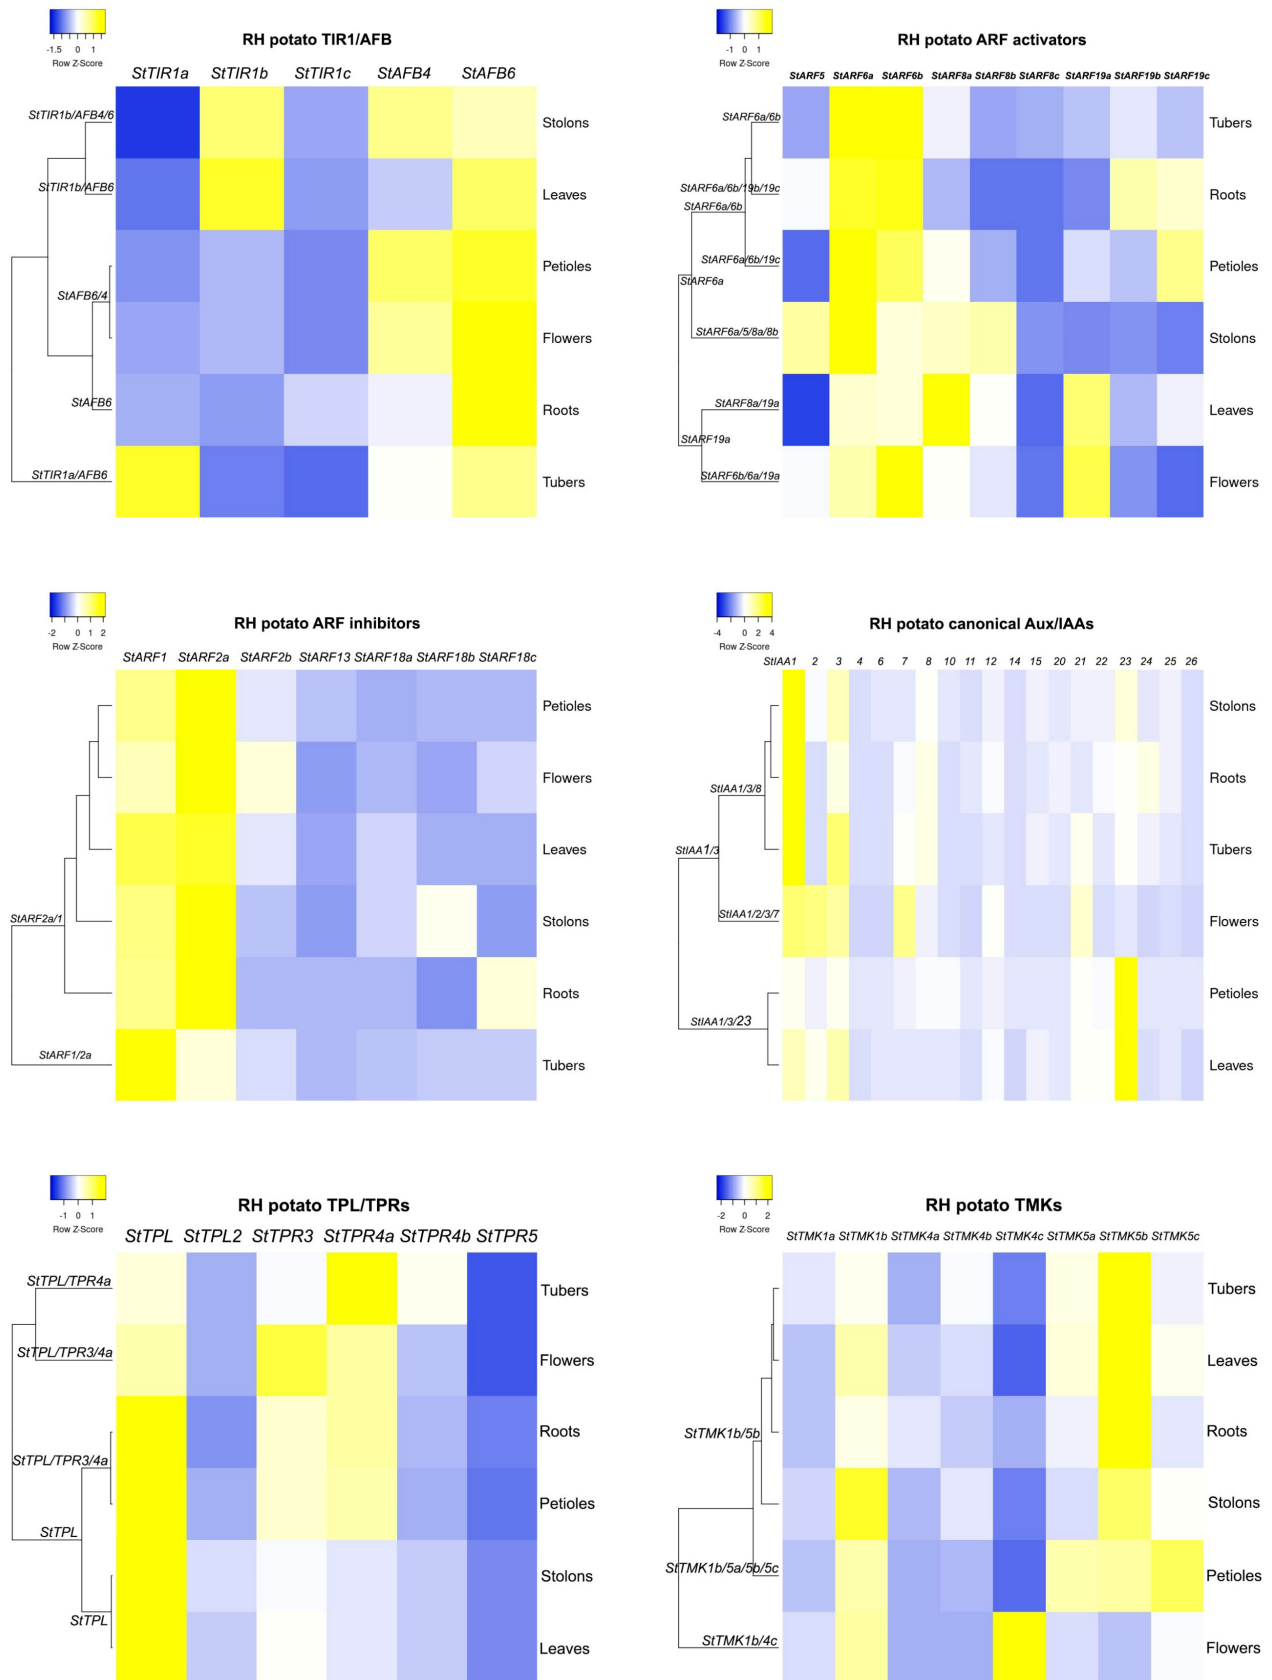

**Figure S6.** Cluster analysis of RH genes expression (see the legend to Figure S5 for details).

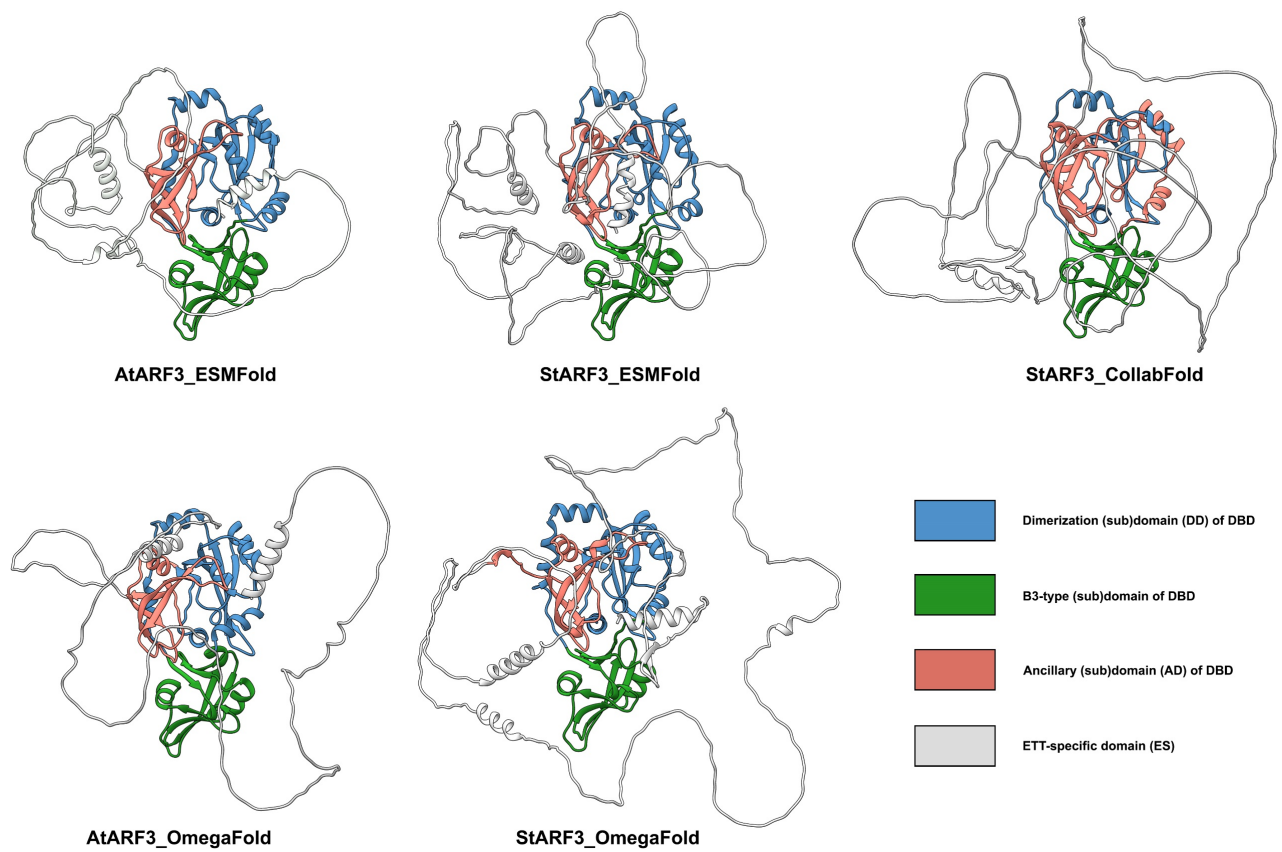

**Figure S7.** Results of *de novo* modeling of full-size *A. thaliana* AtARF3 and *S. tuberosum* StARF3 ETTs using various services implemented in COSMIC<sup>2</sup> [101]: ESMFold, OmegaFold and CollabFold. Red, blue and green indicate the various subdomains of the DBD domain, gray - ET-specific domain (ES). The short unfolded fragments at the N-terminus of the DBD domain have been removed, for better visibility of the C-terminal ES domain.

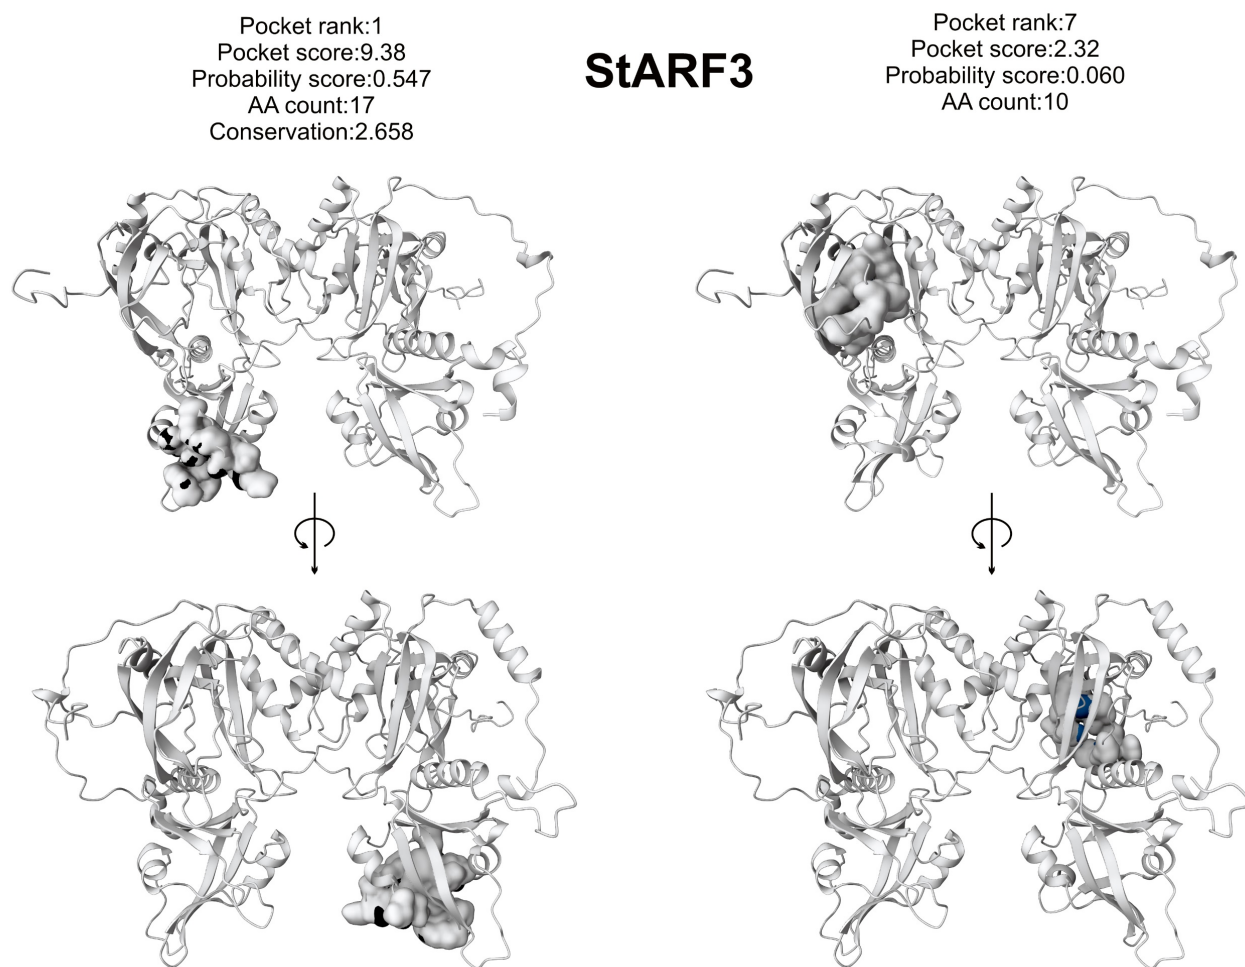

**Figure S8.** Prediction of possible binding sites for a potential noncanonical signaling member protein StARF3, in the PrankWeb server. On the left is the best result; on the right is the result that topologically corresponds to the binding site of the TRIS molecule in the crystal structure of AtARF1 (PDB ID: 6YCQ) [88]. Models are presented in two projections.
